# Supplementary material
Source: PubMed Central journal article supplement (PMC3020763)

## Supplemental Figure 2

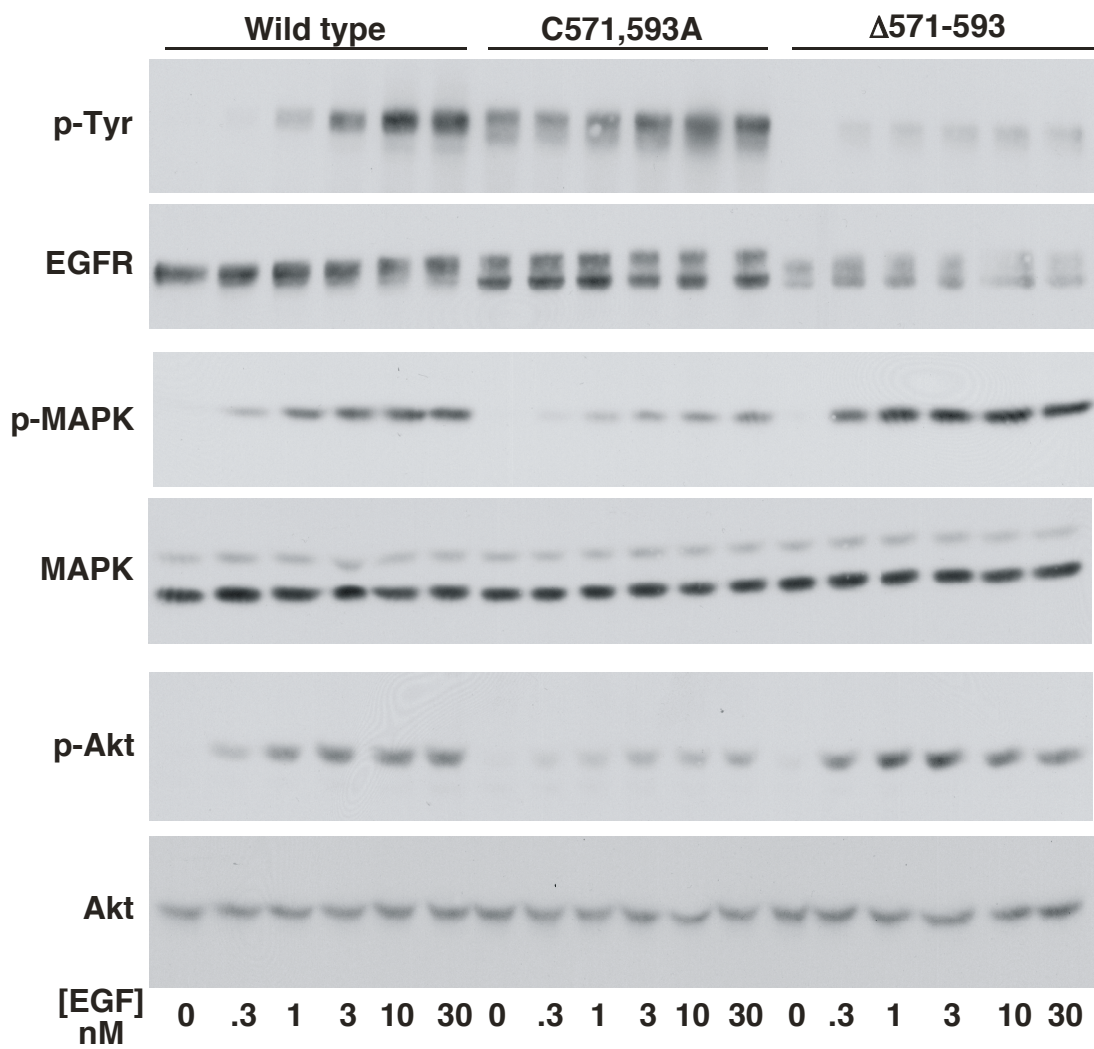

Supplement: supp_M110.182899_jbc.M110.182899-2.pdf [file supp_M110.182899_jbc.M110.182899-2.pdf]
